# Supplementary material for: Three New Resveratrol Derivatives from the Mangrove Endophytic Fungus Alternaria sp
Source: PubMed Central journal article supplement (PMC4052320; doi:10.3390/md12052840), 2014-05-13

## Supplementary Information

- Figure S1.**  $^1\text{H}$  NMR spectrum (600 MHz) of compound **1** in  $(\text{CD}_3)_2\text{CO}$ .
- Figure S2.** Expansion of  $^1\text{H}$  NMR spectrum (600 MHz) of compound **1** in  $(\text{CD}_3)_2\text{CO}$ .
- Figure S3.**  $^{13}\text{C}$  NMR spectrum (150 MHz) of compound **1** in  $(\text{CD}_3)_2\text{CO}$ .
- Figure S4.** HSQC spectrum (600/150 MHz) of compound **1** in  $(\text{CD}_3)_2\text{CO}$ .
- Figure S5.** HMBC spectrum (600/150 MHz) of compound **1** in  $(\text{CD}_3)_2\text{CO}$ .
- Figure S6.** Expansion of HMBC spectrum(600/150 MHz) of compound **1** in  $(\text{CD}_3)_2\text{CO}$ .
- Figure S7.** HRESIMS spectrum of compound **1**.
- Figure S8.** IR spectrum of compound **1**.
- Figure S9.**  $^1\text{H}$  NMR spectrum (600 MHz) of compound **2** in  $(\text{CD}_3)_2\text{CO}$ .
- Figure S10.** Expansion of  $^1\text{H}$  NMR spectrum (600 MHz) of compound **2** in  $(\text{CD}_3)_2\text{CO}$ .
- Figure S11.**  $^{13}\text{C}$  NMR spectrum (150 MHz) of compound **2** in  $(\text{CD}_3)_2\text{CO}$ .
- Figure S12.** HSQC spectrum (600/150 MHz) of compound **2** in  $(\text{CD}_3)_2\text{CO}$ .
- Figure S13.** HMBC spectrum (600/150 MHz) of compound **2** in  $(\text{CD}_3)_2\text{CO}$ .
- Figure S14.** Expansion of HMBC spectrum(600/150 MHz) of compound **2** in  $(\text{CD}_3)_2\text{CO}$ .
- Figure S15.** HRESIMS spectrum of compound **2**.
- Figure S16.** IR spectrum of compound **2**.
- Figure S17.**  $^1\text{H}$  NMR spectrum (600 MHz) of compound **3** in  $(\text{CD}_3)_2\text{CO}$ .
- Figure S18.** Expansion of  $^1\text{H}$  NMR spectrum (600 MHz) of compound **3** in  $(\text{CD}_3)_2\text{CO}$ .
- Figure S19.**  $^{13}\text{C}$  NMR spectrum (150 MHz) of compound **3** in  $(\text{CD}_3)_2\text{CO}$ .
- Figure S20.** HSQC spectrum (600/150 MHz) of compound **3** in  $(\text{CD}_3)_2\text{CO}$ .
- Figure S21.** HMBC spectrum (600/150 MHz) of compound **3** in  $(\text{CD}_3)_2\text{CO}$ .
- Figure S22.** Expansion of HMBC spectrum(600/150 MHz) of compound **3** in  $(\text{CD}_3)_2\text{CO}$ .
- Figure S23.** HRESIMS spectrum of compound **3**.
- Figure S24.** IR spectrum of compound **3**.

**Figure S1.**  $^1\text{H}$  NMR spectrum (600 MHz) of compound **1** in  $(\text{CD}_3)_2\text{CO}$ .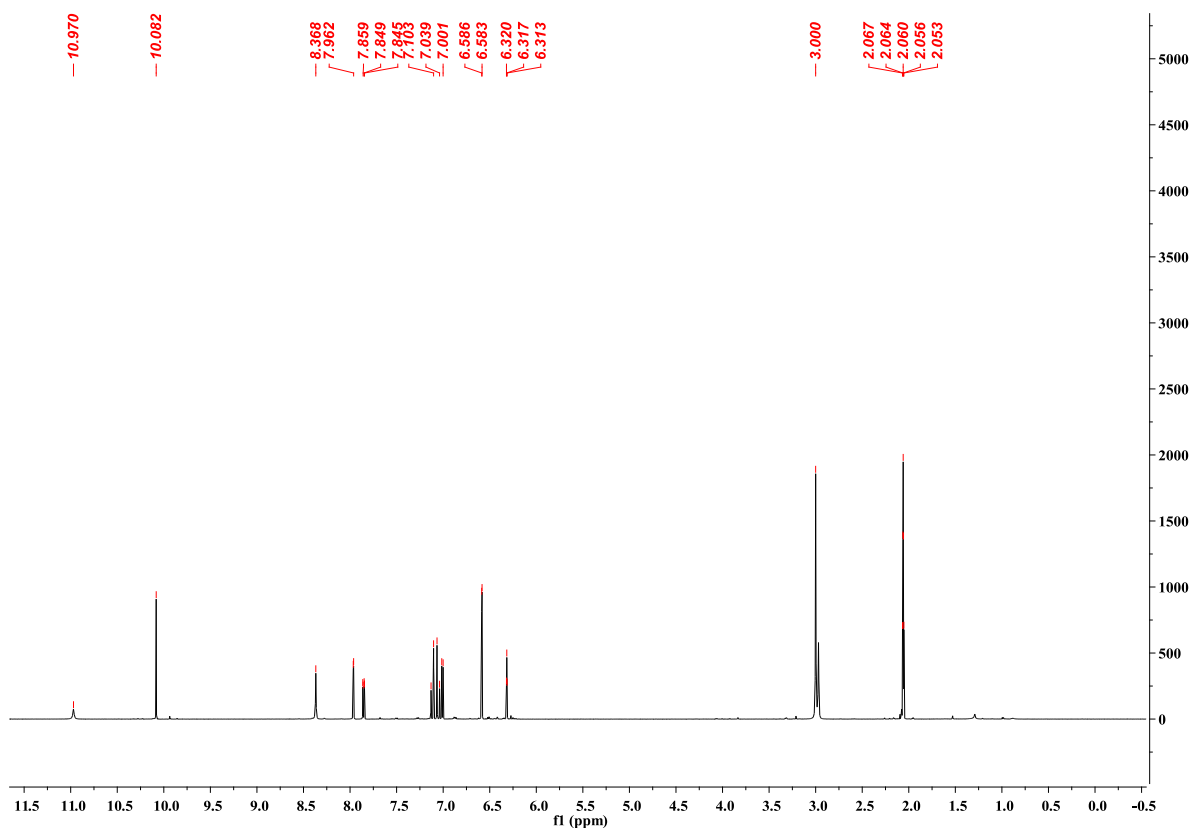**Figure S2.** Expansion of  $^1\text{H}$  NMR spectrum (600 MHz) of compound **1** in  $(\text{CD}_3)_2\text{CO}$ .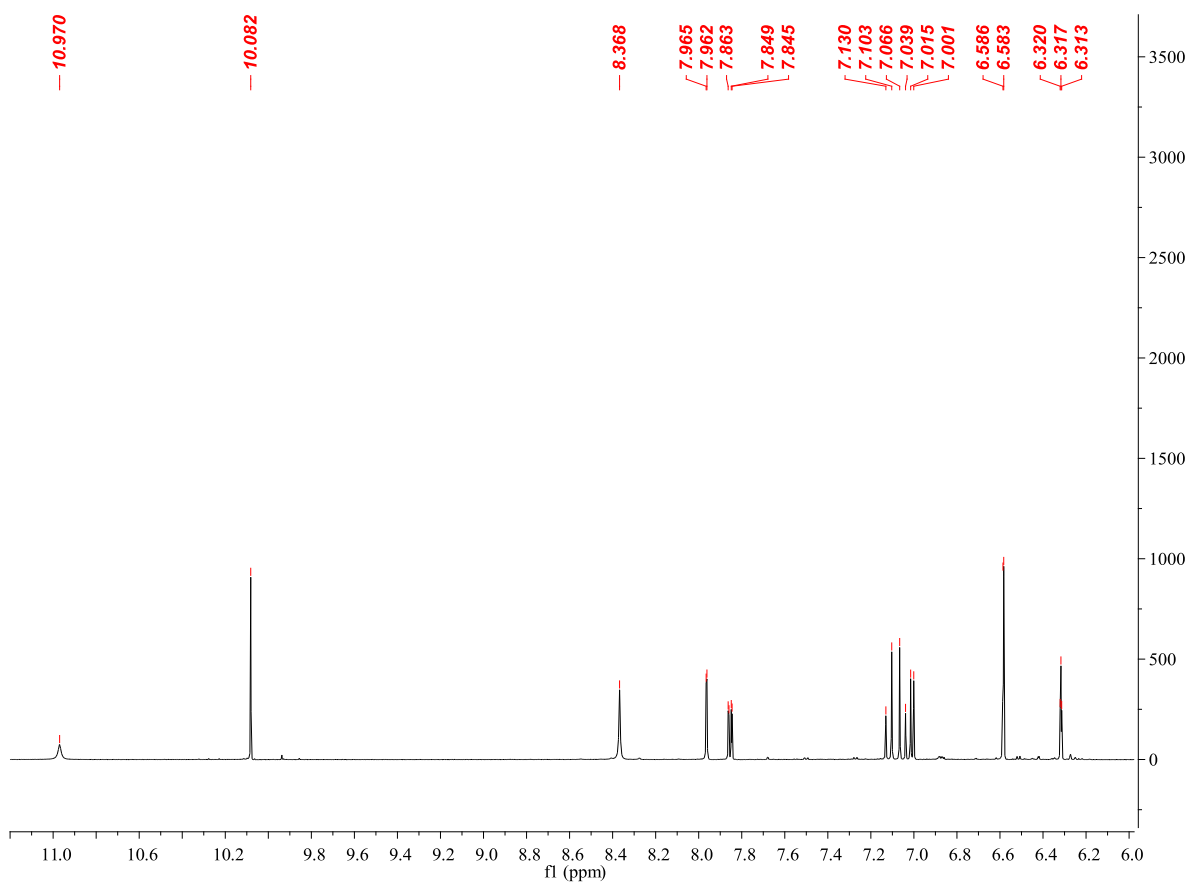

**Figure S3.**  $^{13}\text{C}$  NMR spectrum (150 MHz) of compound **1** in  $(\text{CD}_3)_2\text{CO}$ .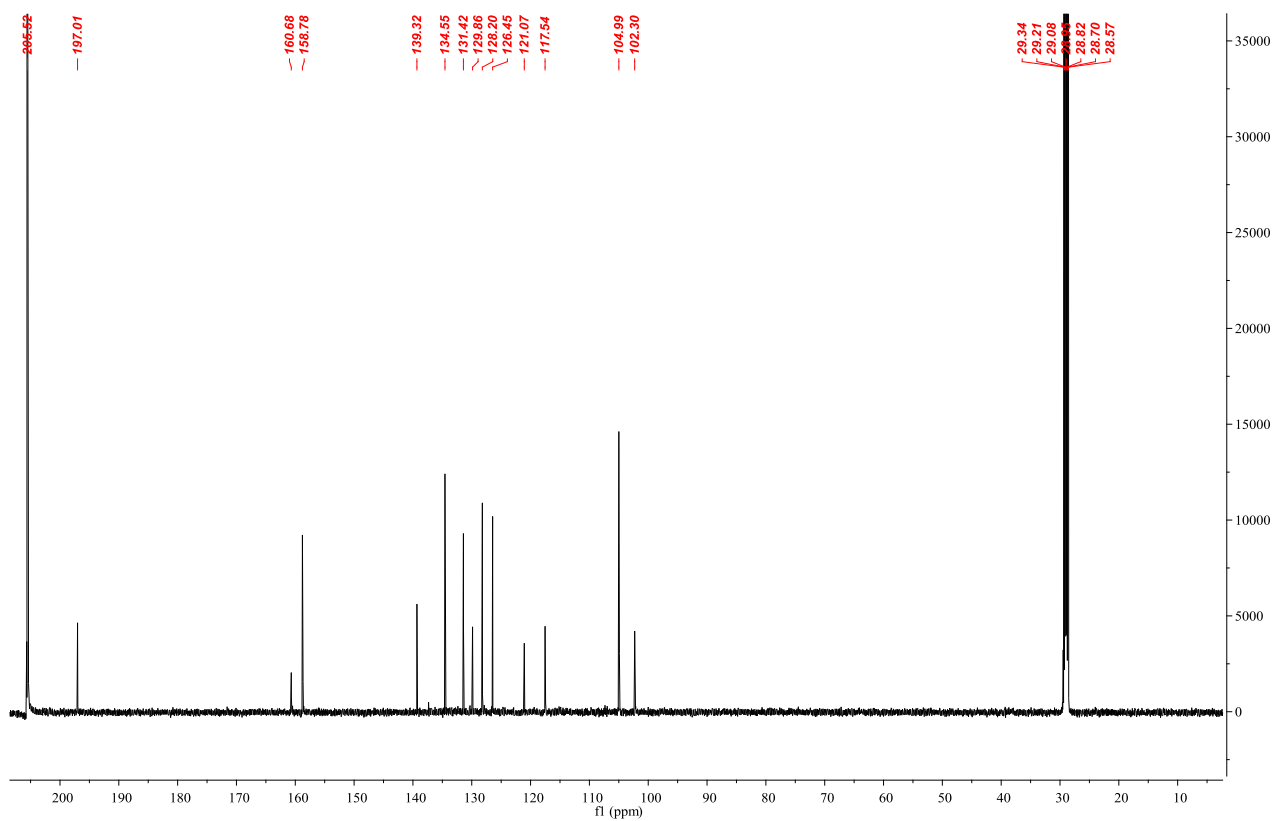**Figure S4.** HSQC spectrum (600/150 MHz) of compound **1** in  $(\text{CD}_3)_2\text{CO}$ .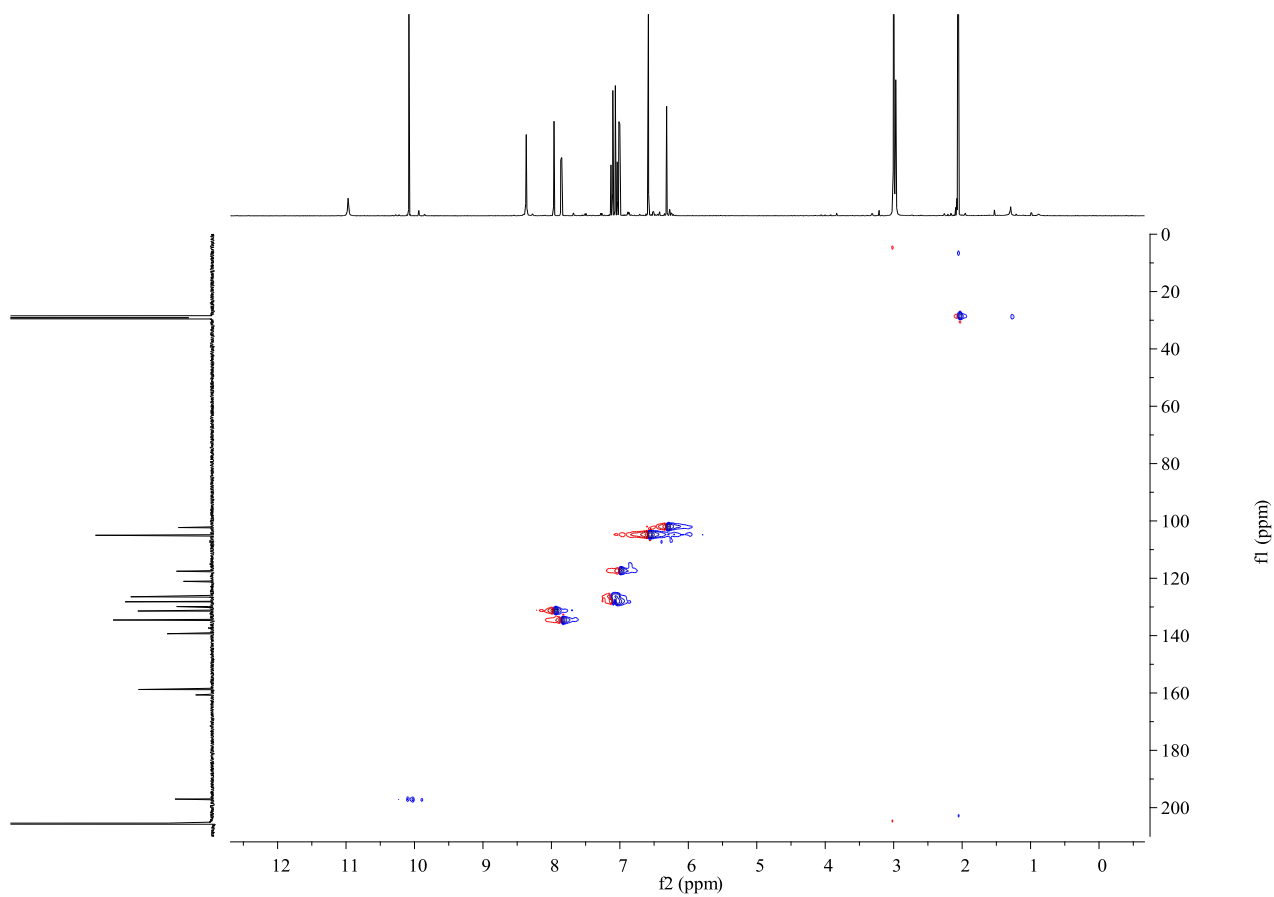

**Figure S5.** HMBC spectrum (600/150 MHz) of compound **1** in  $(\text{CD}_3)_2\text{CO}$ .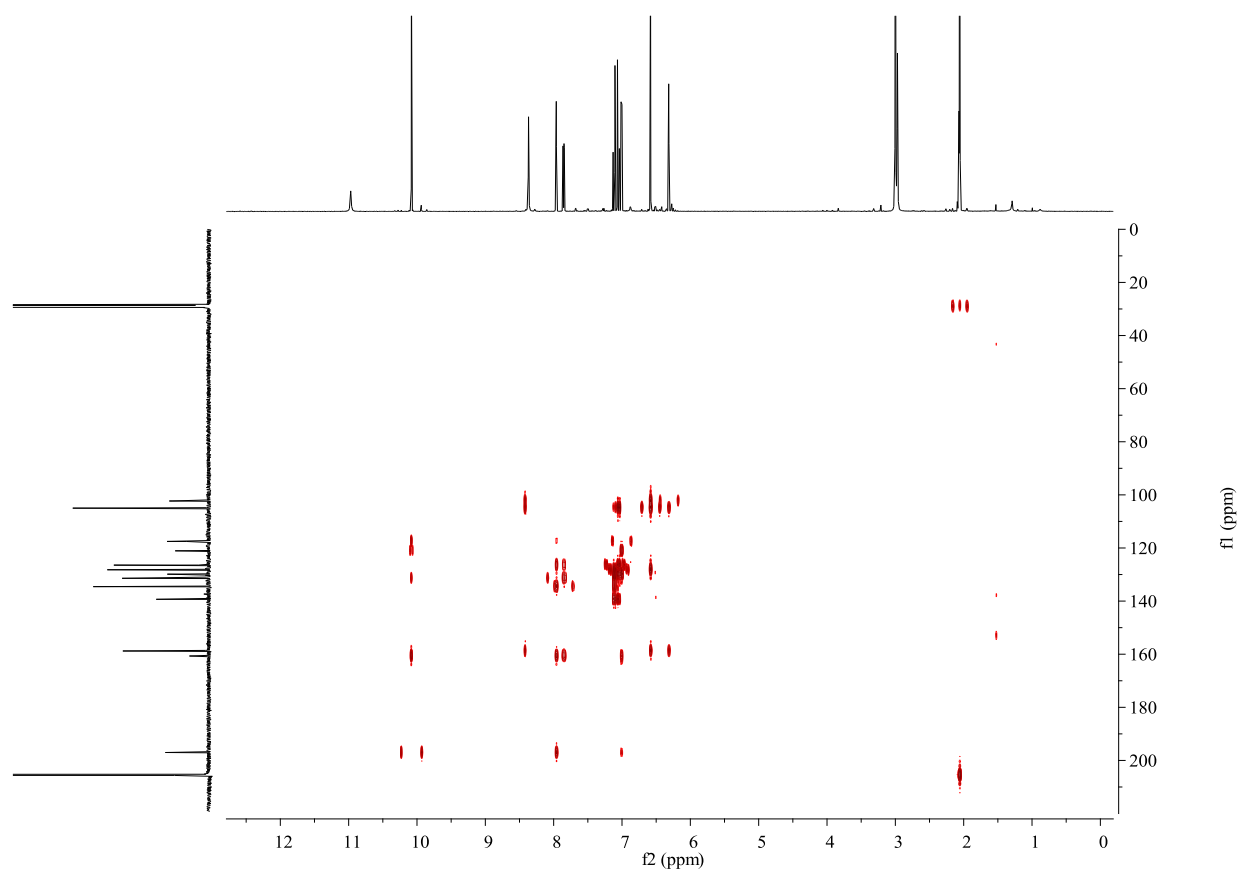**Figure S6.** Expansion of (600/150 MHz) of compound **1** in  $(\text{CD}_3)_2\text{CO}$ .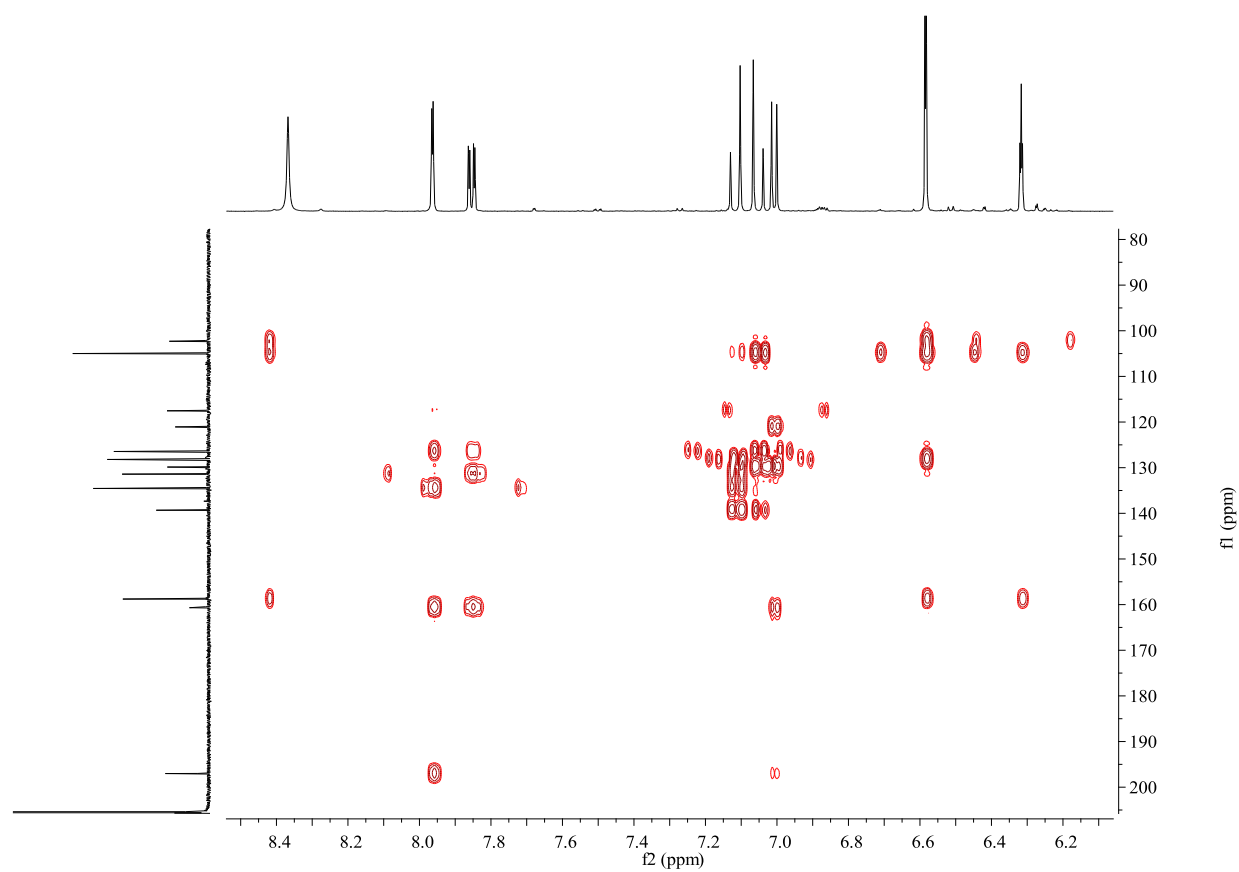

Figure S7. HRESIMS spectrum of compound 1.

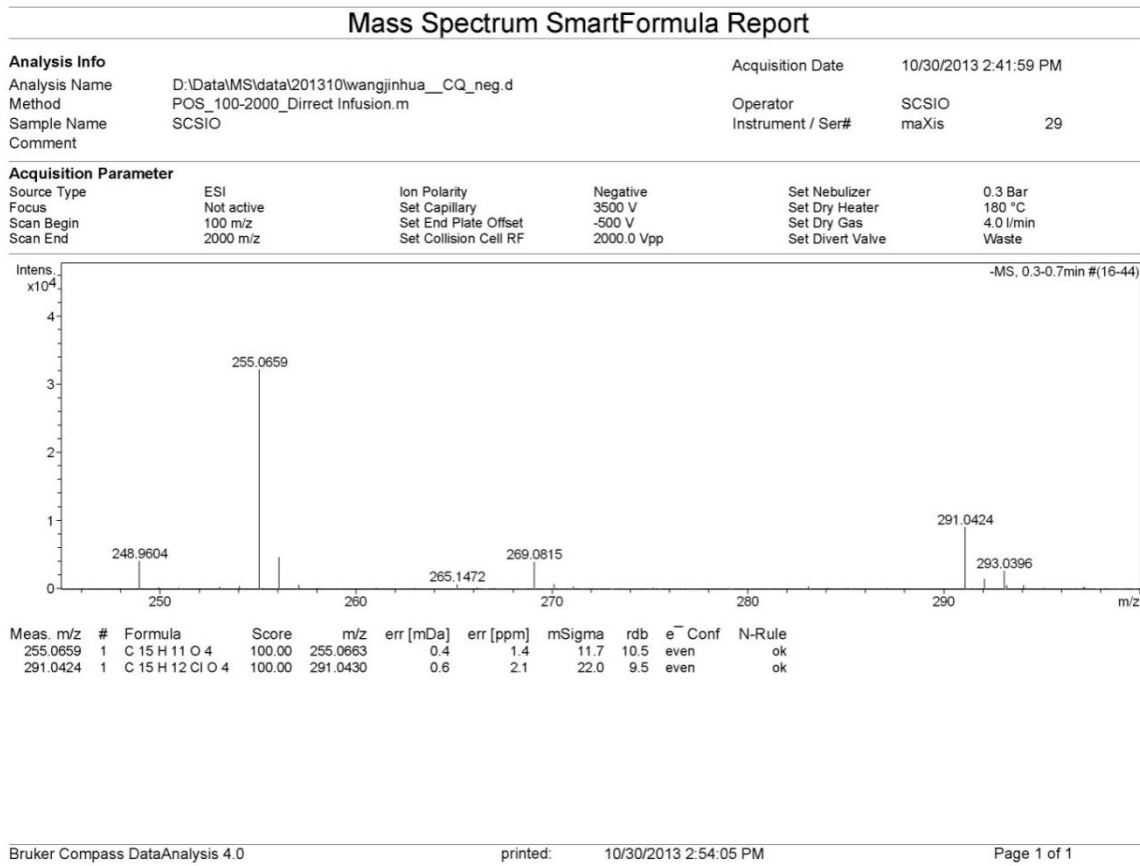

Figure S8. IR spectrum of compound 1.

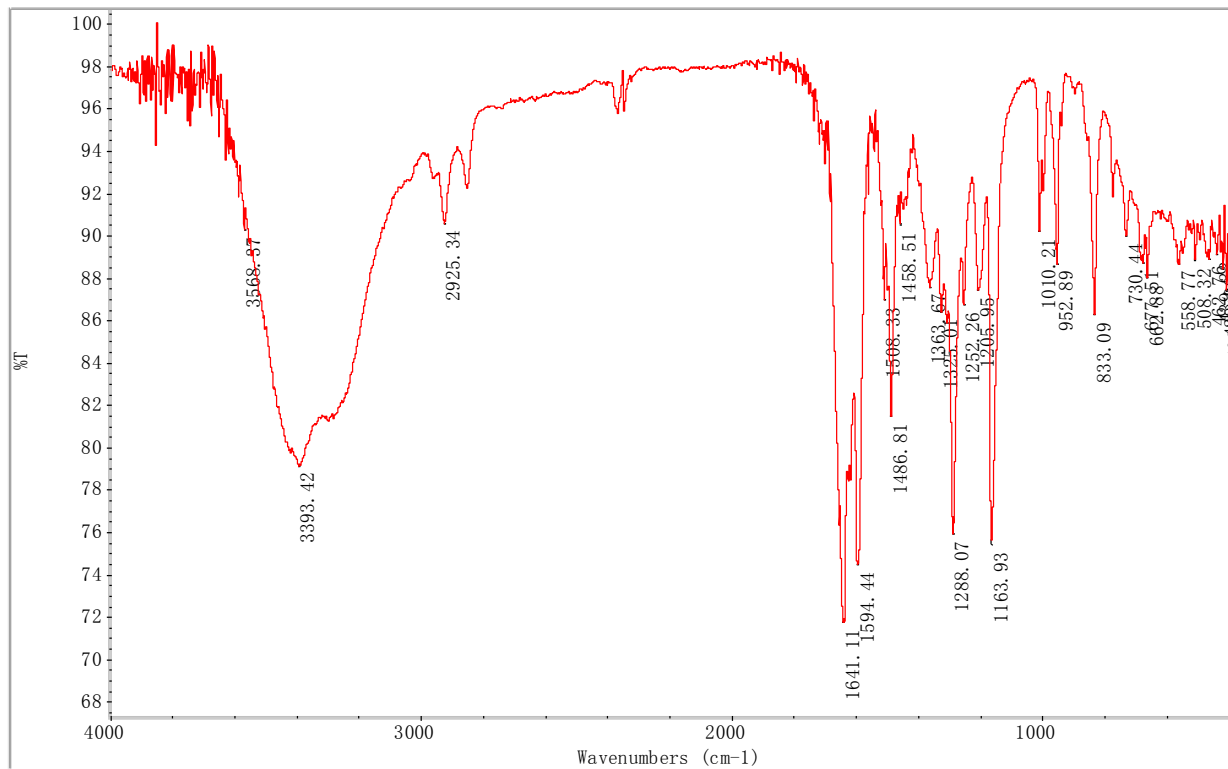

**Figure S9.**  $^1\text{H}$  NMR spectrum (600 MHz) of compound **2** in  $(\text{CD}_3)_2\text{CO}$ .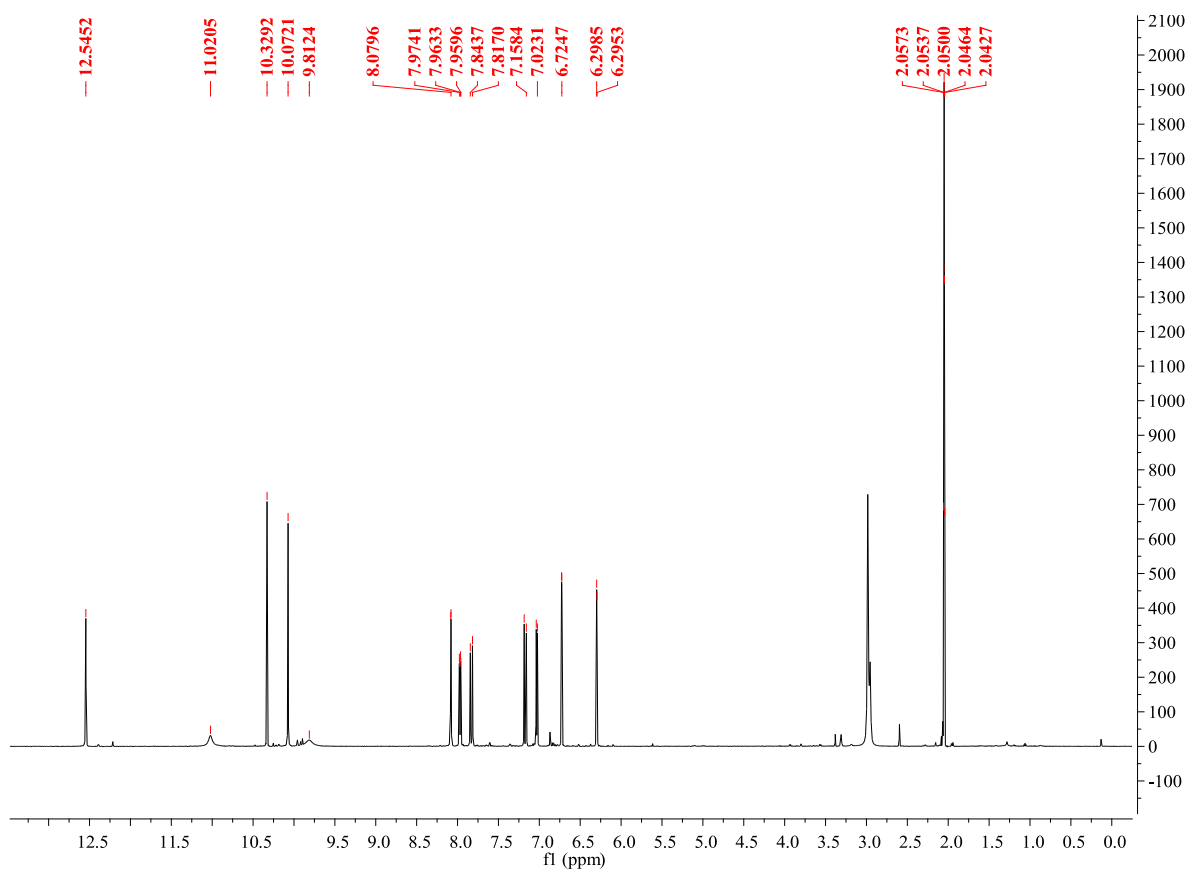**Figure S10.** Expansion of  $^1\text{H}$  NMR spectrum (600 MHz) of compound **2** in  $(\text{CD}_3)_2\text{CO}$ .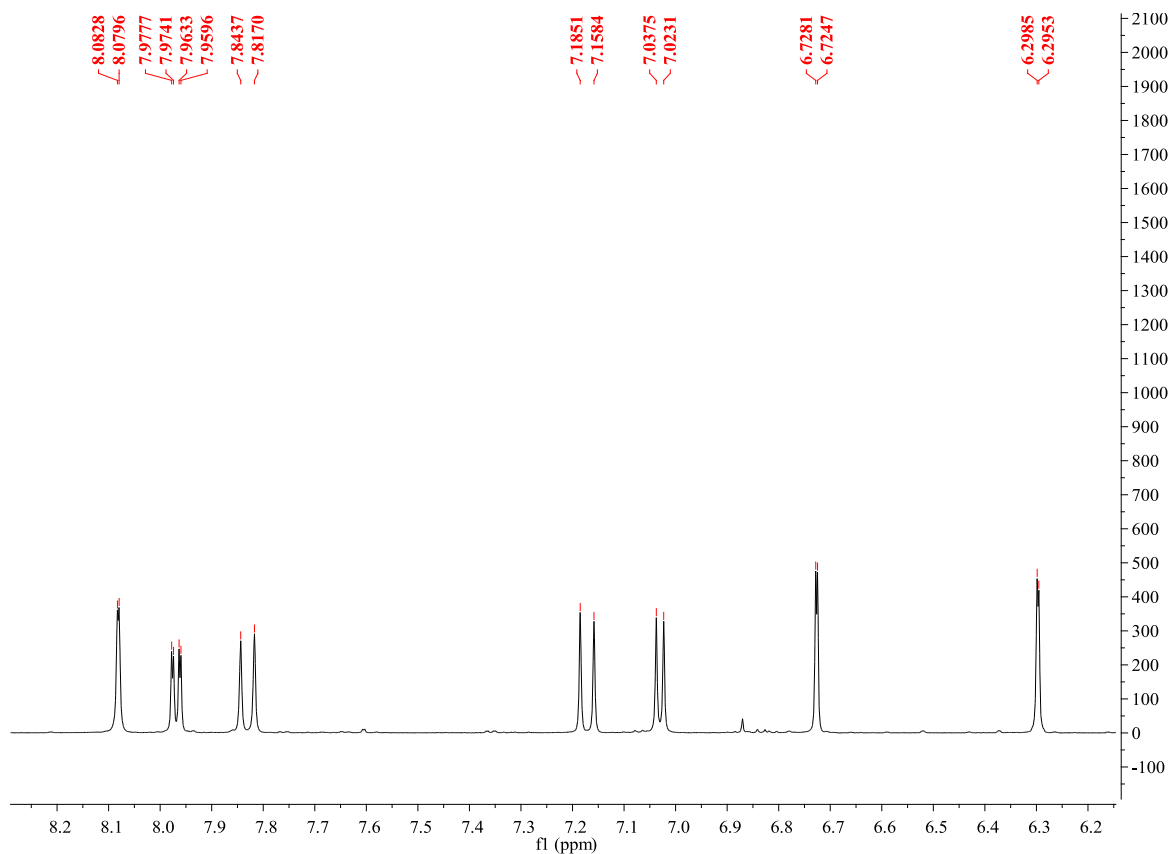

**Figure S11.**  $^{13}\text{C}$  NMR spectrum (150 MHz) of compound **2** in  $(\text{CD}_3)_2\text{CO}$ .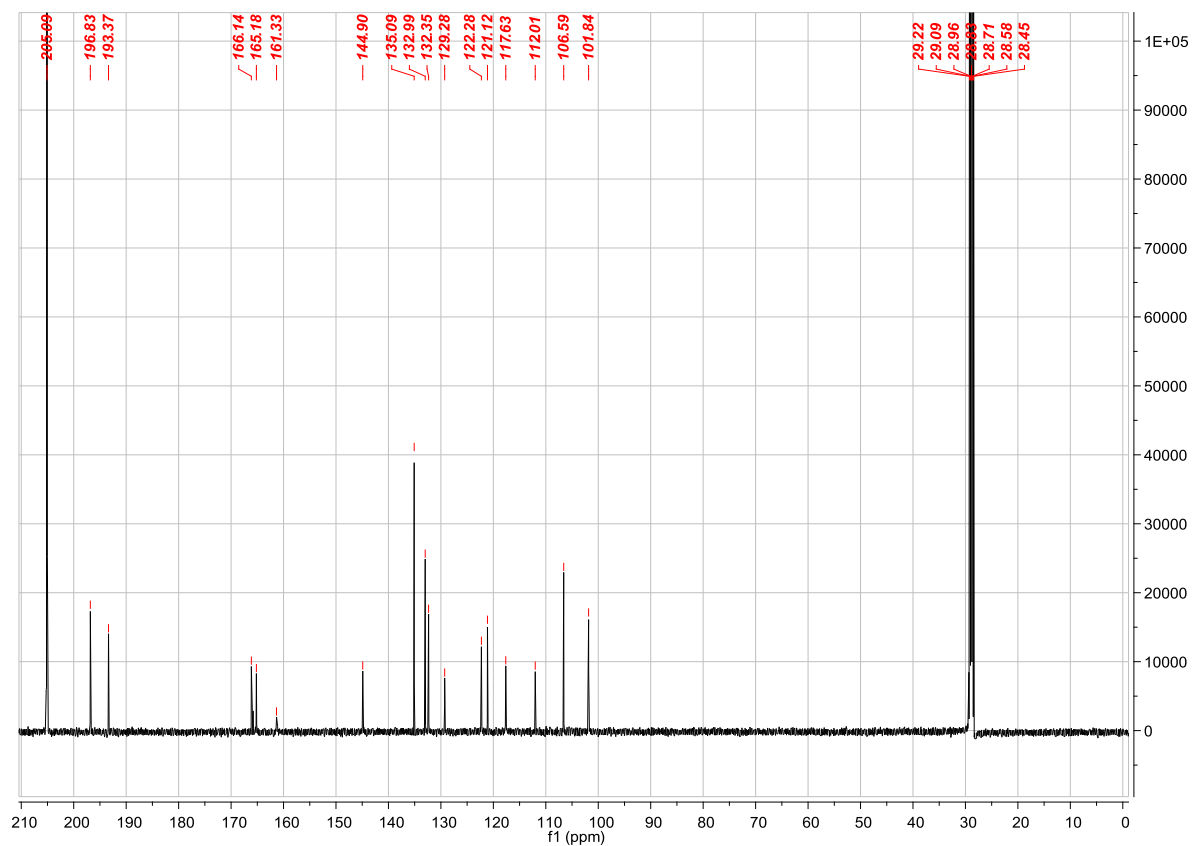**Figure S12.** HSQC spectrum (600/150 MHz) of compound **2** in  $(\text{CD}_3)_2\text{CO}$ .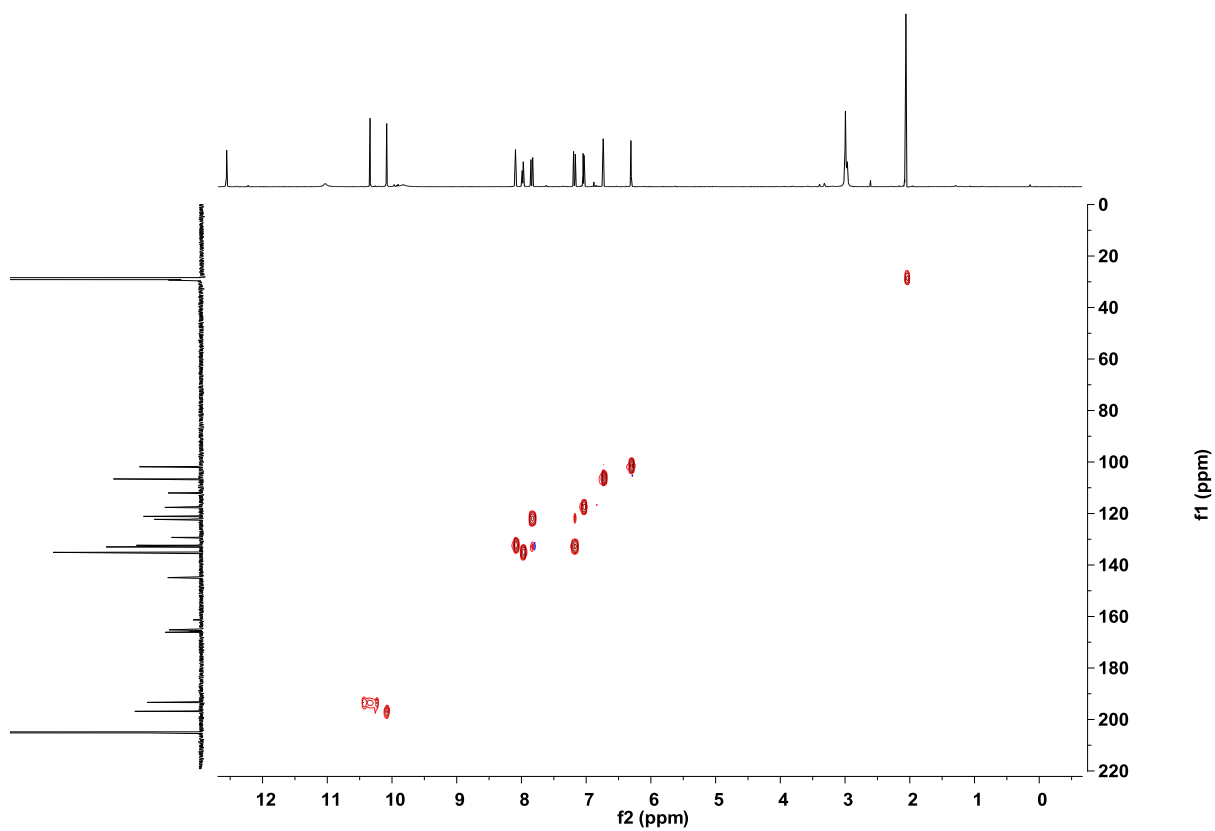

**Figure S13.** HMBC spectrum (600/150 MHz) of compound **2** in  $(\text{CD}_3)_2\text{CO}$ .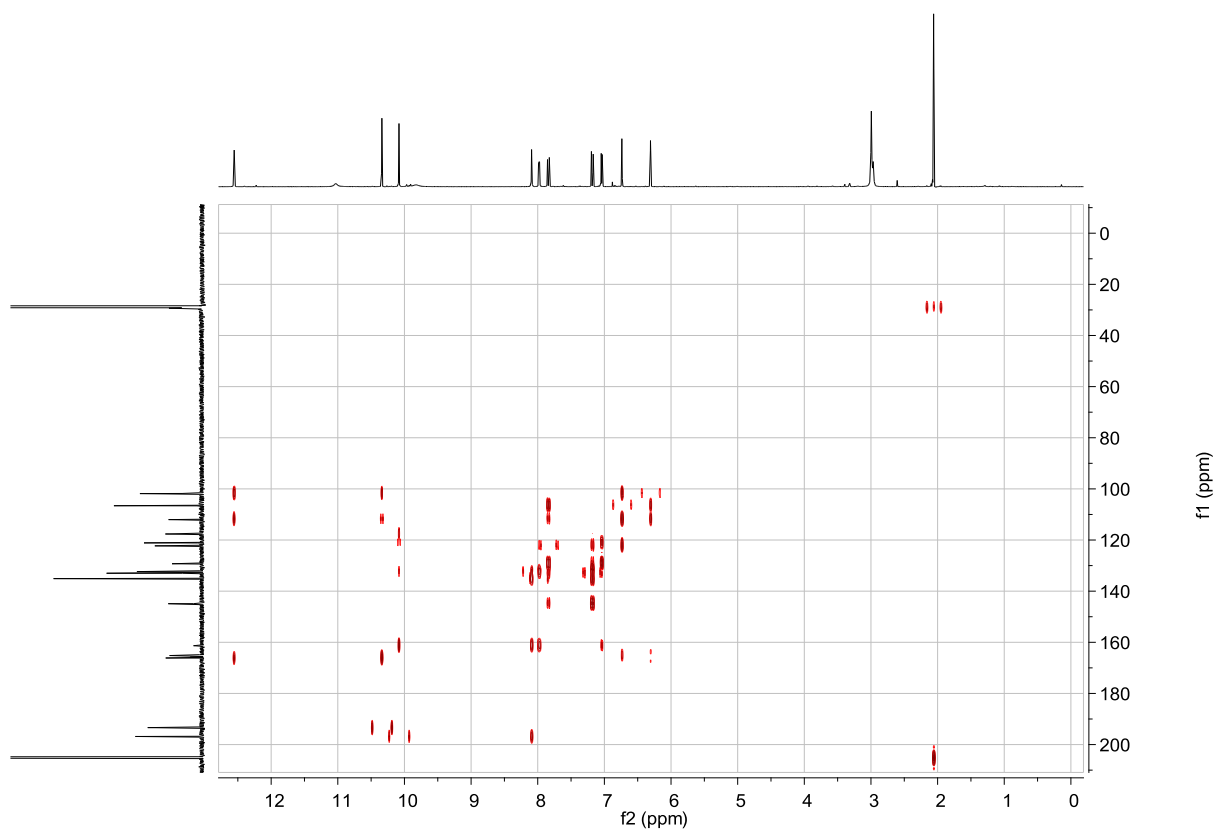**Figure S14.** Expansion of HMBC spectrum (600/150 MHz) of compound **2** in  $(\text{CD}_3)_2\text{CO}$ .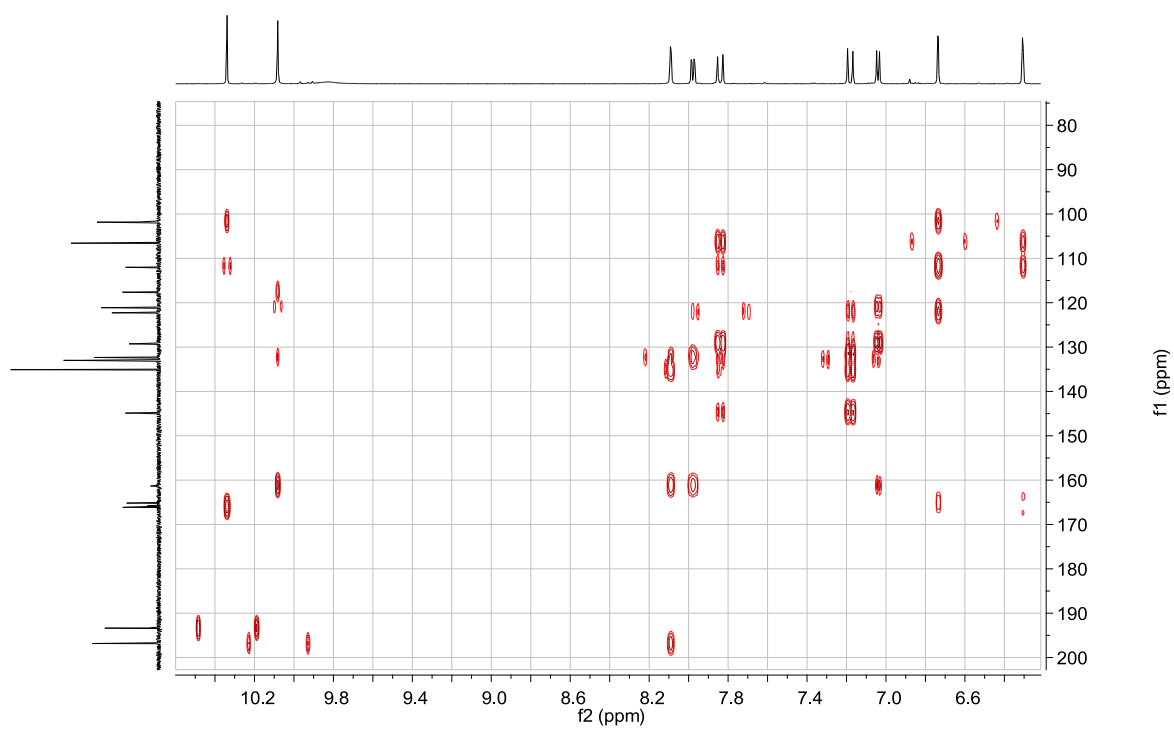



Figure S15. HRESIMS spectrum of compound 2.

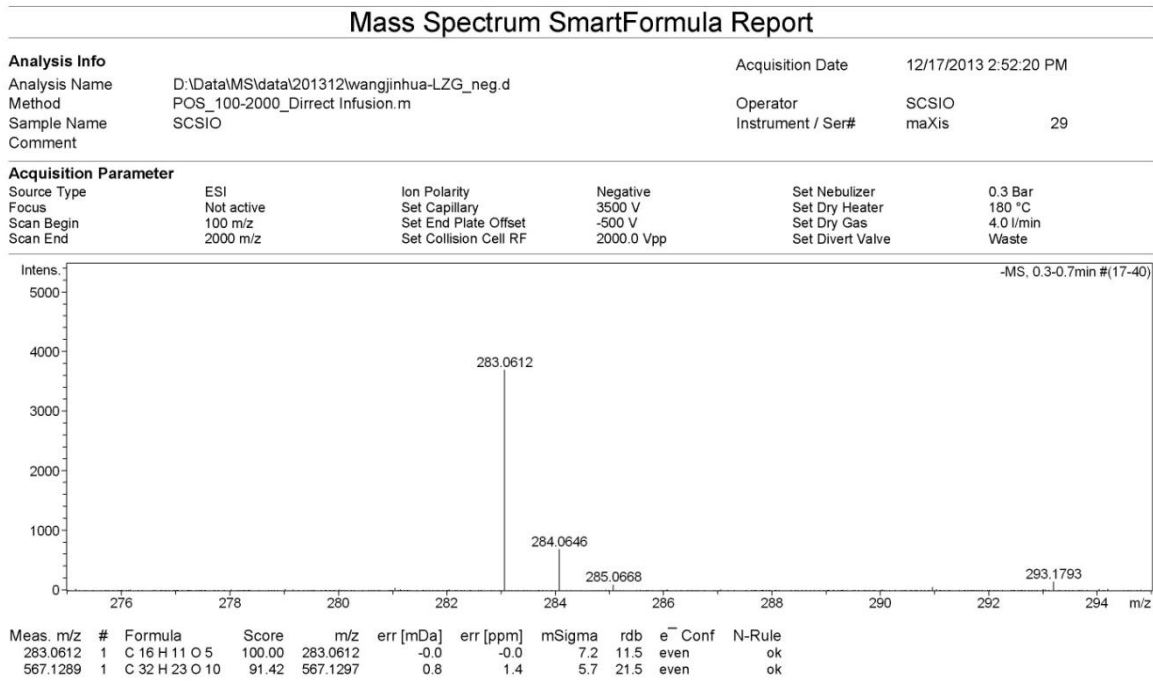

Figure S16. IR spectrum of compound 2.

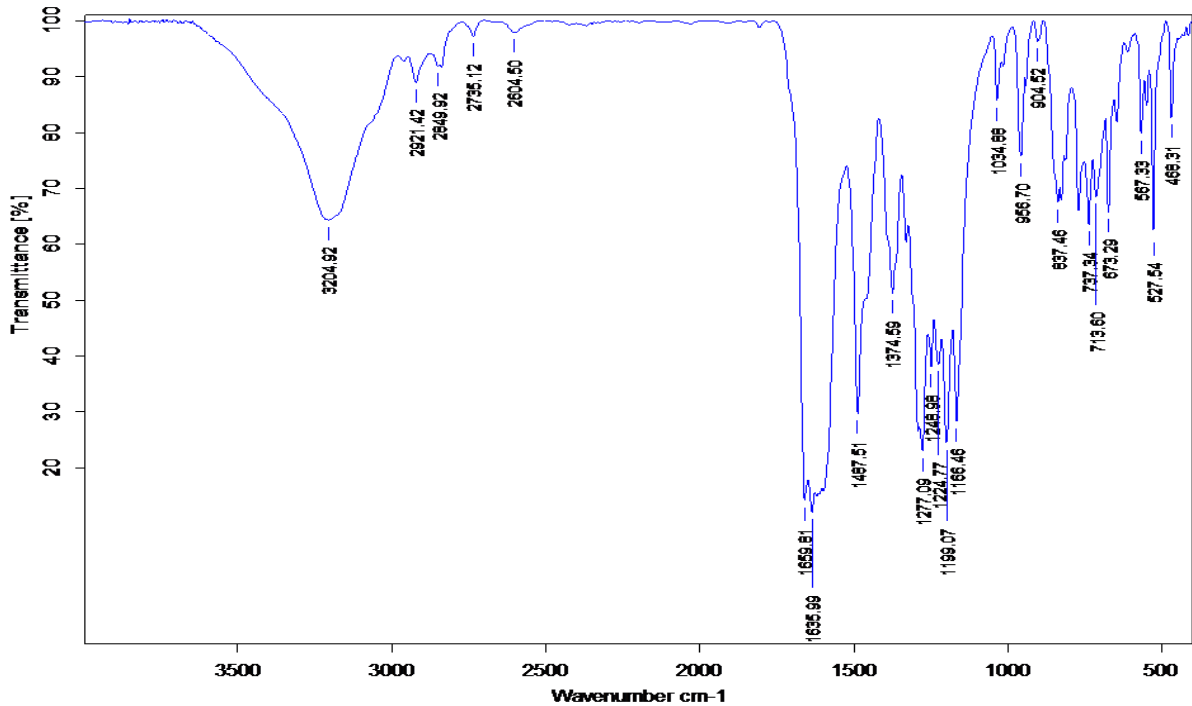

**Figure S17.**  $^1\text{H}$  NMR spectrum (600 MHz) of compound **3** in  $(\text{CD}_3)_2\text{CO}$ .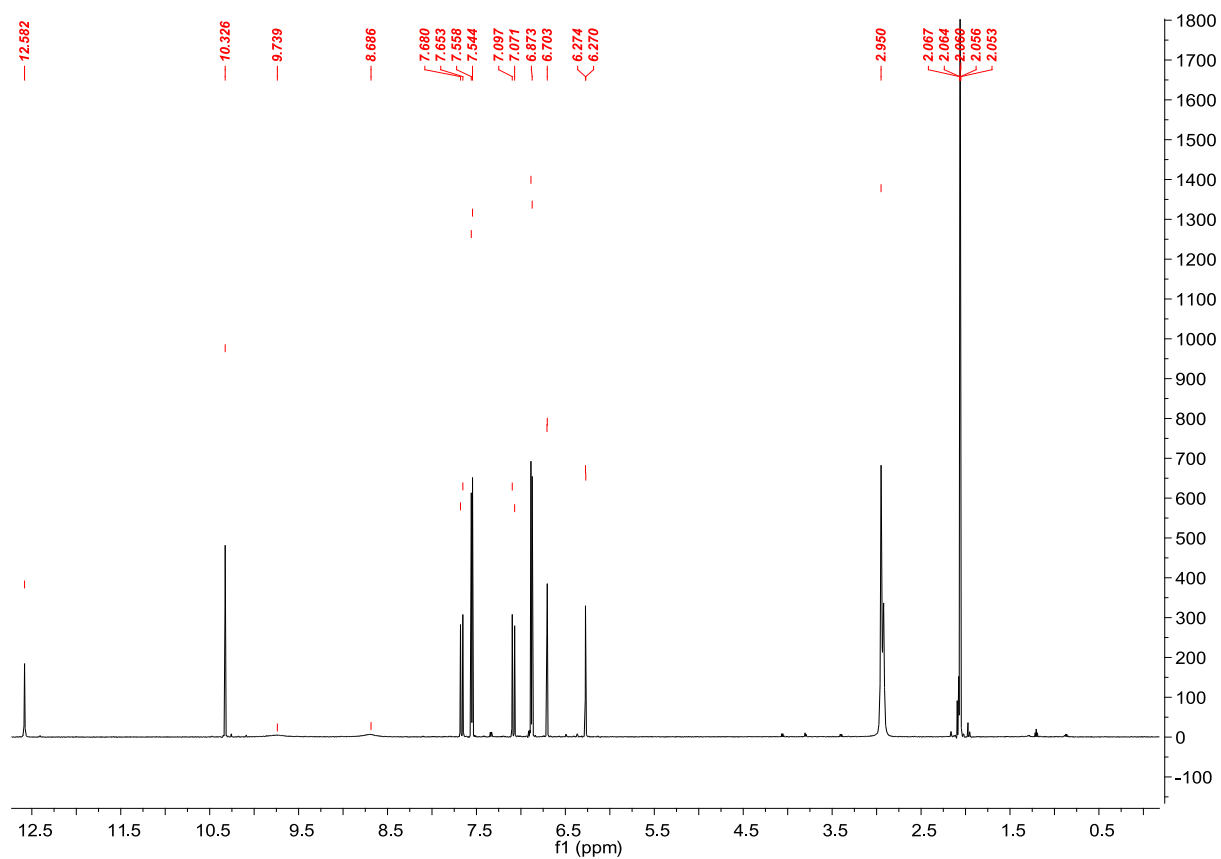**Figure S18.** Expansion of  $^1\text{H}$  NMR spectrum (600 MHz) of compound **3** in  $(\text{CD}_3)_2\text{CO}$ .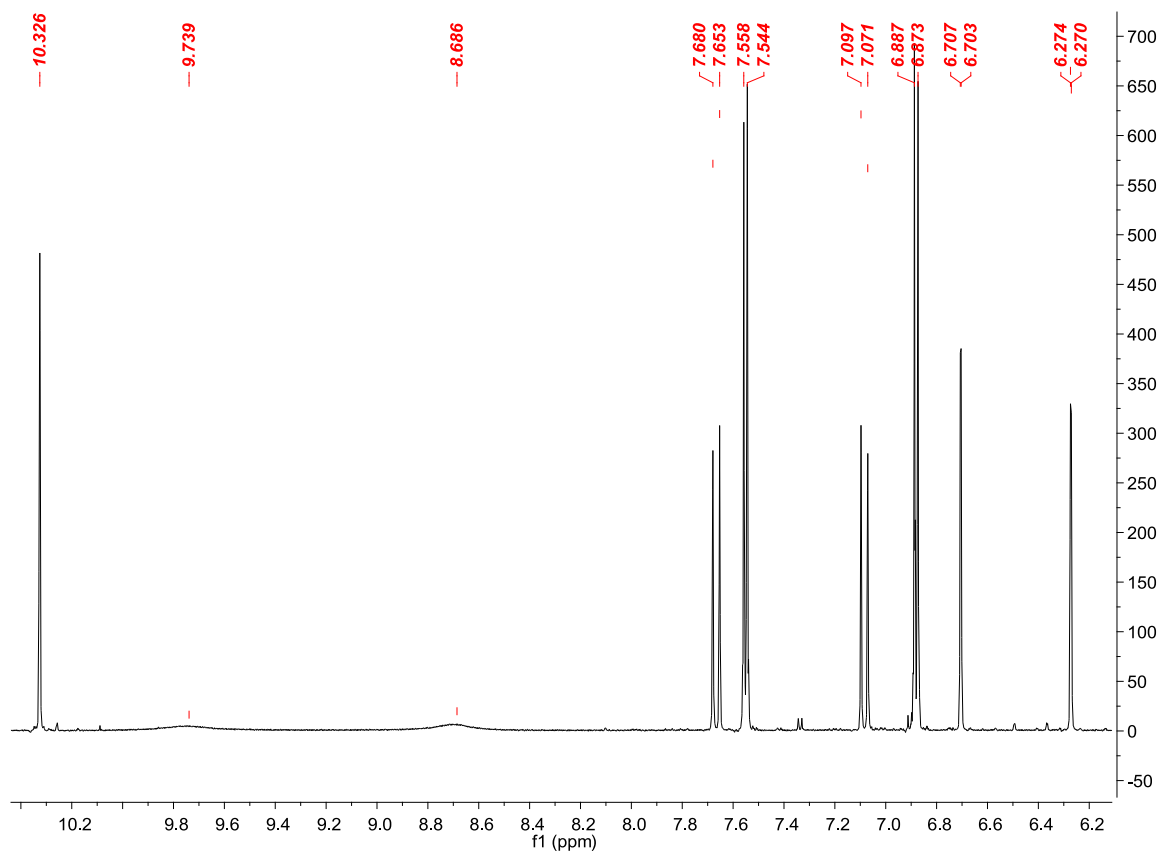

**Figure S19.**  $^{13}\text{C}$  NMR spectrum (150 MHz) of compound **3** in  $(\text{CD}_3)_2\text{CO}$ .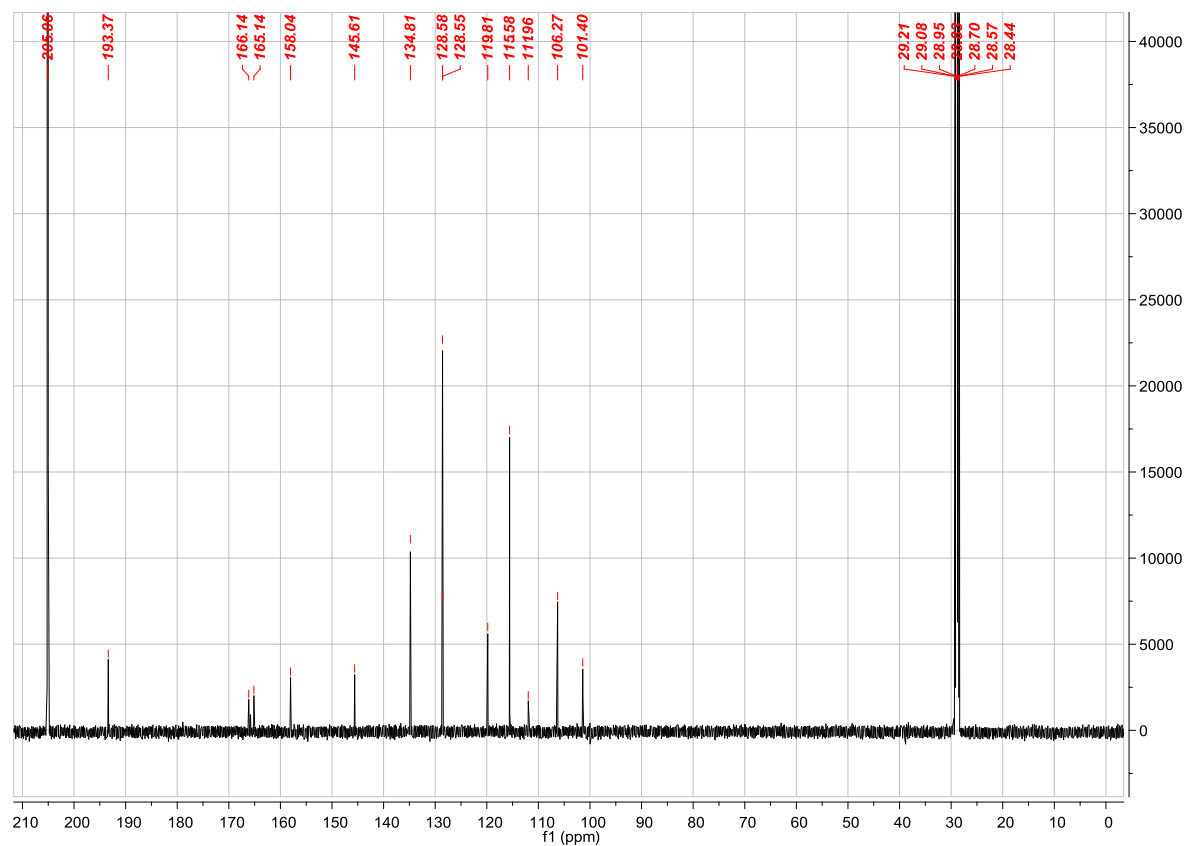**Figure S20.** HSQC spectrum (600/150 MHz) of compound **3** in  $(\text{CD}_3)_2\text{CO}$ .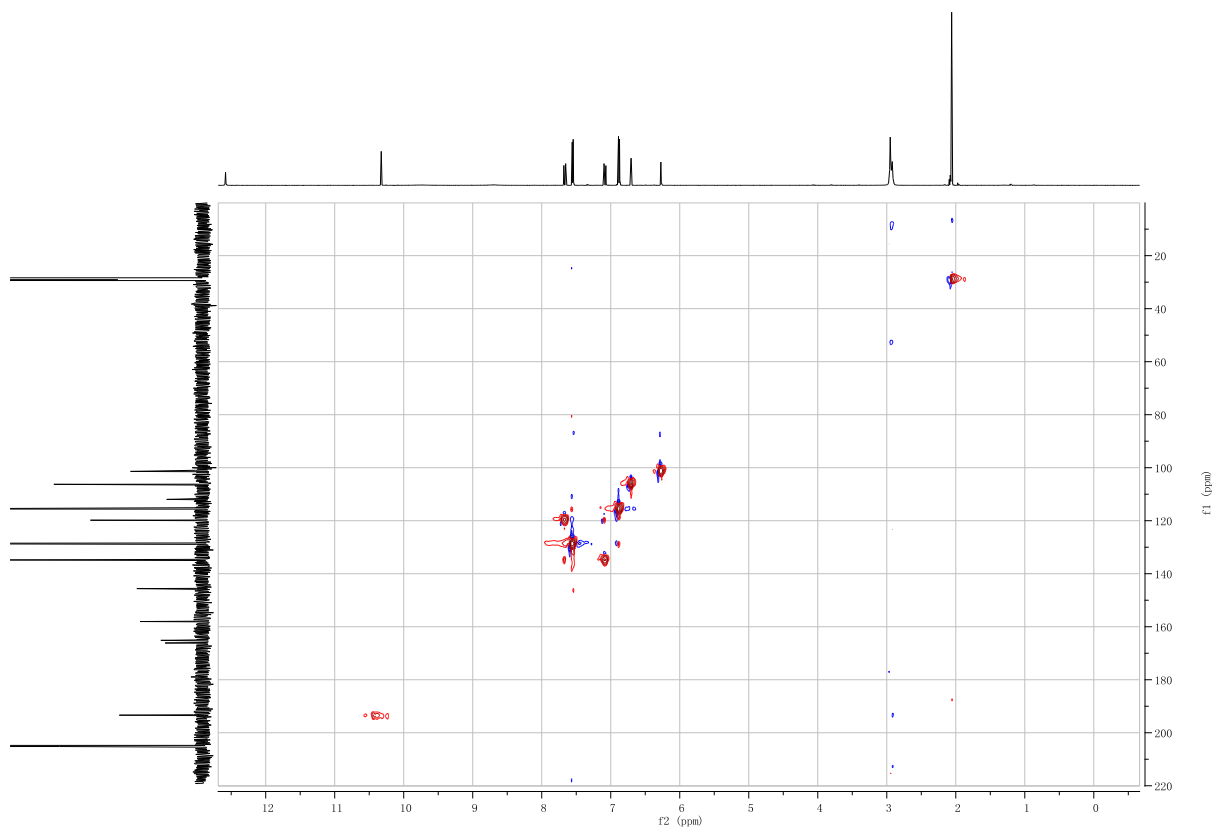

**Figure S21.** HMBC spectrum (600/150 MHz) of compound **3** in  $(\text{CD}_3)_2\text{CO}$ .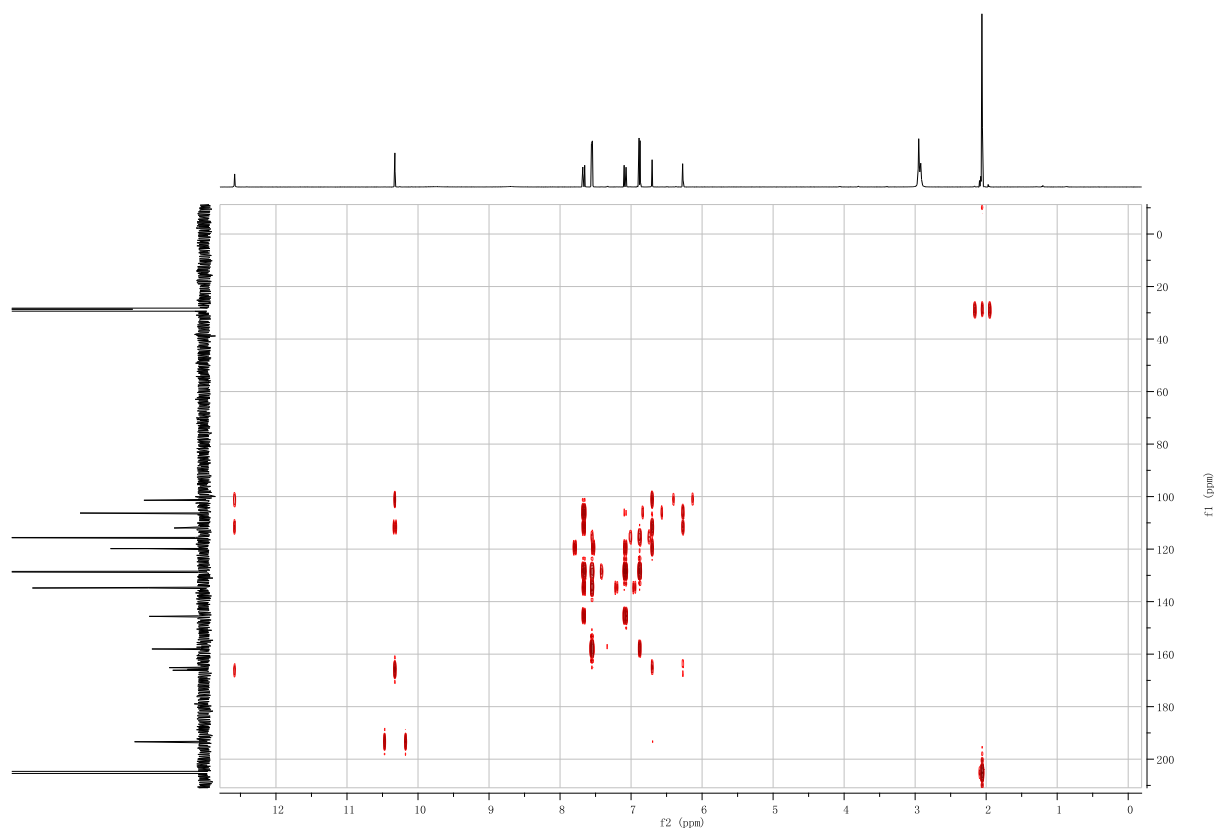**Figure S22.** Expansion of HMBC spectrum (600/150 MHz) of compound **3** in  $(\text{CD}_3)_2\text{CO}$ .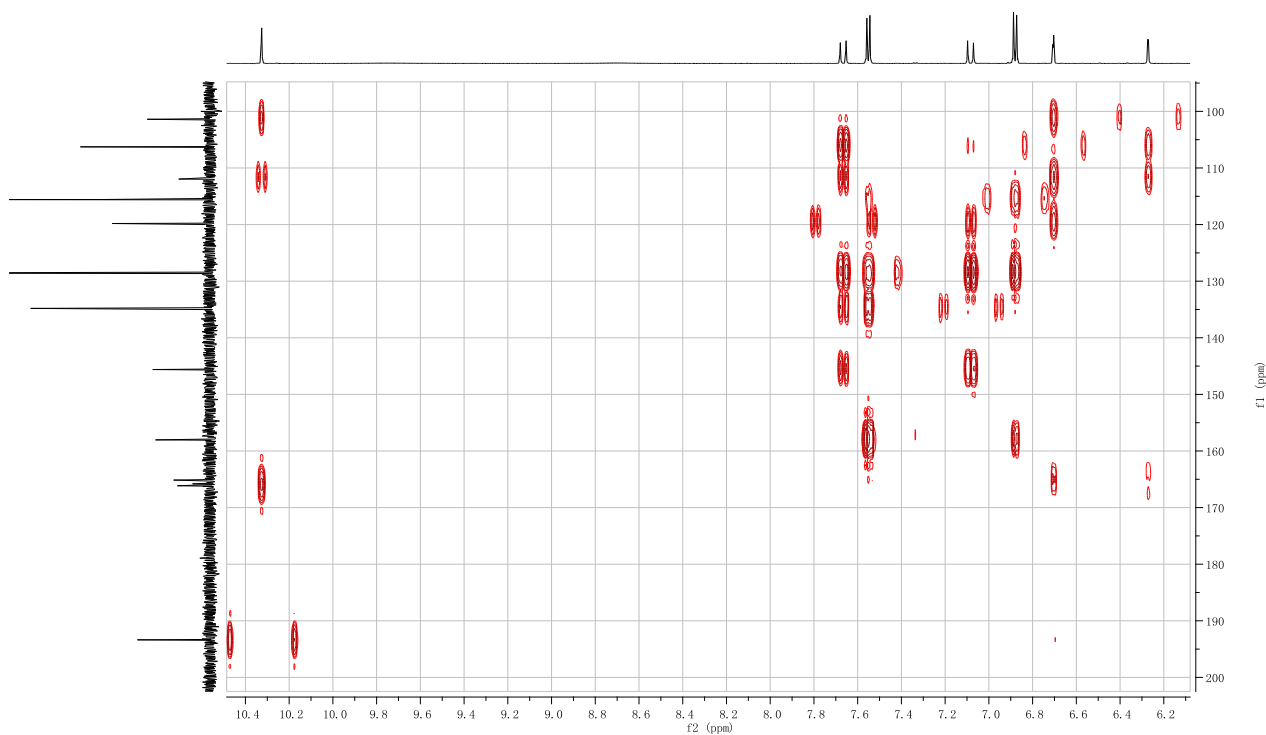

Figure S23. HRESIMS spectrum of compound 3.

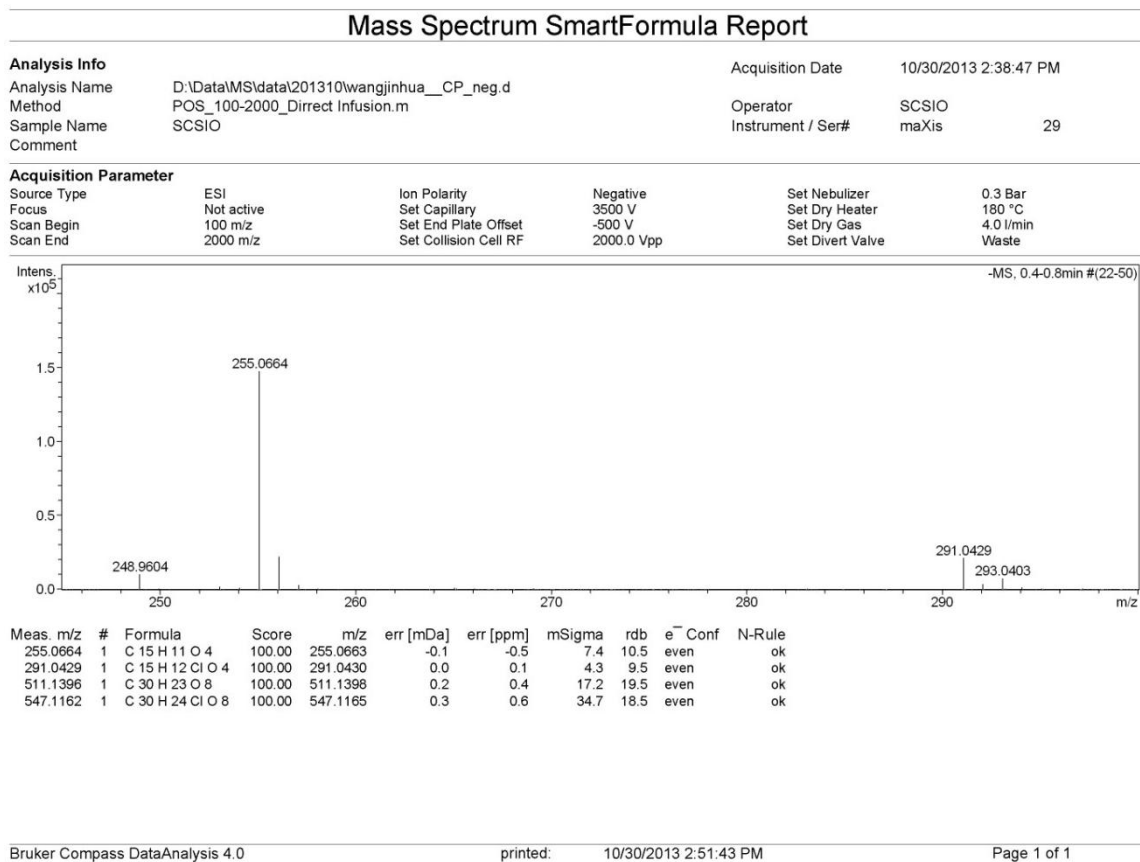

Figure S24. IR spectrum of compound 3.

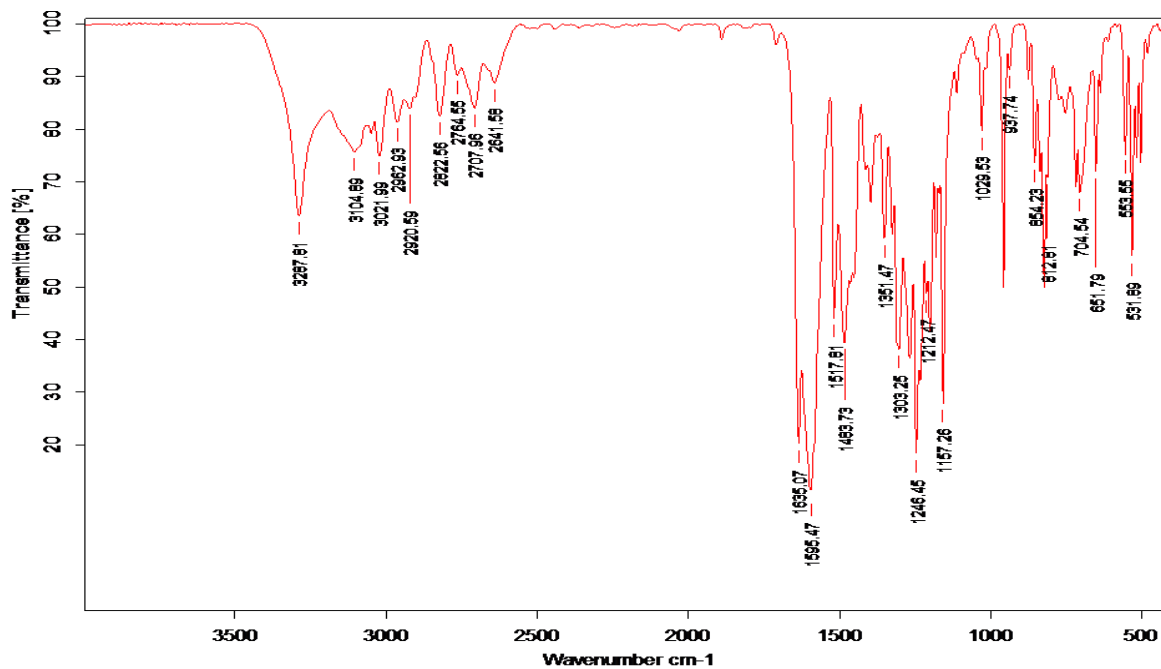

Supplement: marinedrugs-12-02840-s001.pdf [file marinedrugs-12-02840-s001.pdf]
